# Supplementary material for: A novel chiral terpyridine macrocycle as a fluorescent sensor for enantioselective recognition of amino acid derivativesElectronic supplementary information (ESI) available: plots for estimation of binding constants for tpy macrocycle 1 with (R)-PhEtOMe. See http://www.rsc.org/suppdata/cc/b3/b313960c/
Source: Royal Society of Chemistry journal article supplement (doi:10.1039/b313960c), 2004-01-01
Supplement: b313960c.doc [file b313960c.doc]

**Supplementary Information**

(a) (b)

**Fig. S5** Estimation of binding constants for tpy macrocycle **1** with (*R*)-PhEtOMe in CH2Cl2 at room temperature: (a) The plot based on the 1:1 binding model: **Io/(I - Io**) versus [**G**]-1; (b) The plot based on the 1:2 binding model: **Io/(I - Io)** versus [**G**]-2.
